# Supplementary material for: Distribution of Gold Nanoparticles in the Anterior Chamber of the Eye after Intracameral Injection for Glaucoma Therapy
Source: MDPI journal article supplement (doi:10.3390/pharmaceutics13060901), 2021-06-17
Supplement: s1 [file s1]

# Supplementary Materials: Distribution of Gold Nanoparticles in the Anterior Chamber of the Eye after Intracameral Injection for Glaucoma Therapy

Tobias Sonntag, Franziska Froemel, W. Daniel Stamer, Andreas Ohlmann, Rudolf Fuchshofer, Miriam Breunig

## S1: <sup>1</sup>H-NMR Spectra of Hyaluronic Acid (HA) and Thiolated Hyaluronic Acid (HA-SH)

HA-SH was characterized using a Avance 300 NMR-spectrometer (Bruker Bio Spin, Ettlingen, Germany). <sup>1</sup>H-NMR spectra of HA and HA-SH in Deuterium oxide were compared and revealed an additional peak at  $\delta=3.2$  ppm, indicating a successful modification of HA.

### Hyaluronic acid (HA)

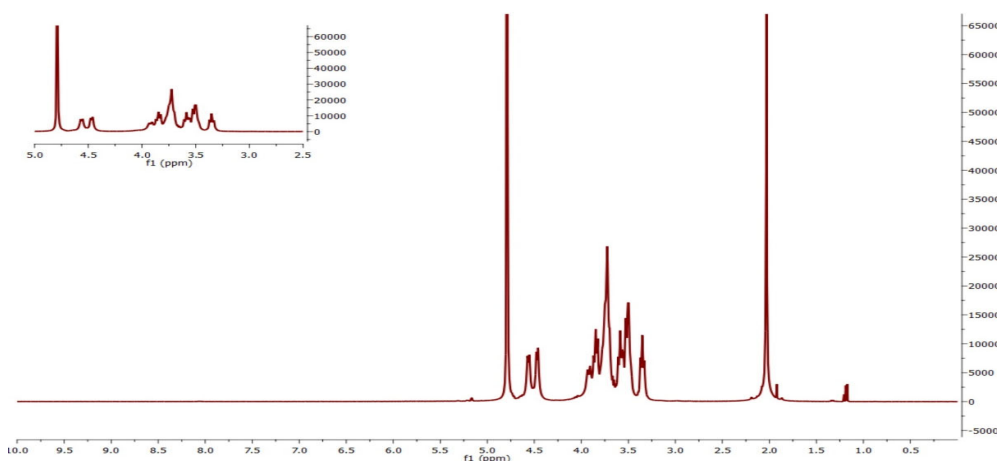

### Thiolated hyaluronic acid (HA-SH)

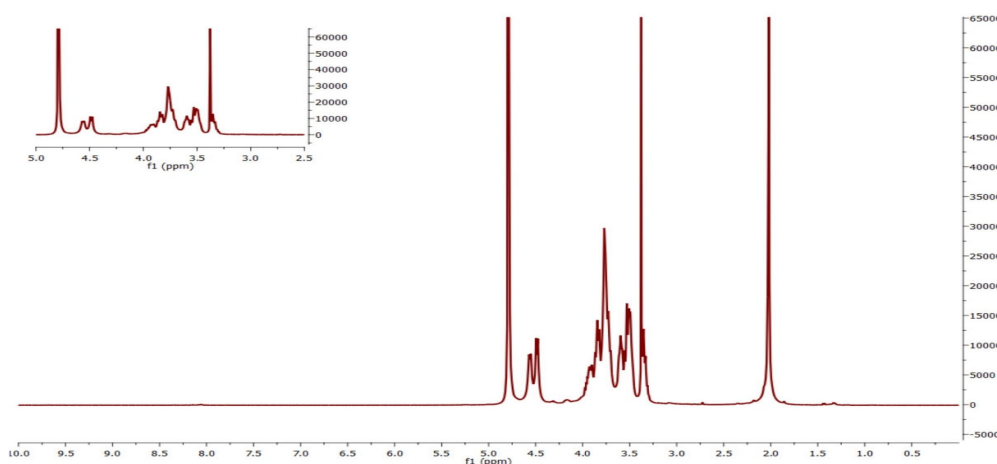

**Figure S1.** <sup>1</sup>H-NMR spectra of HA and HA-SH in comparison. <sup>1</sup>H-NMR-spectra indicated the successful synthesis of HA-SH due to the additional peak at  $\delta=3.2$  ppm in the spectrum of HA-SH.

## S2: Analysis of Protein Adsorption

Incubation of nanoparticles in a physiological environment will lead to protein adsorption on the surface [1]. This is of utmost importance because protein adsorption significantly influences the colloidal stability as well as the interaction with potential target cells [1]. To evaluate protein adsorption, AuNPs and HA-AuNPs were incubated with serum containing culture medium. Particles were washed and afterwards an SDS-PAGE of washed particles was performed. Proteins that were adsorbed to the nanoparticle surface will be peeled off in an electric field and separated according to their molecular weight. As a control the same amount of serum without particles was used. The bands arising from the HA-AuNPs were much fainter and nearly invisible compared to AuNPs. Therefore, in direct comparison it became evident that a much lower number of proteins adsorbed to HA-AuNPs.

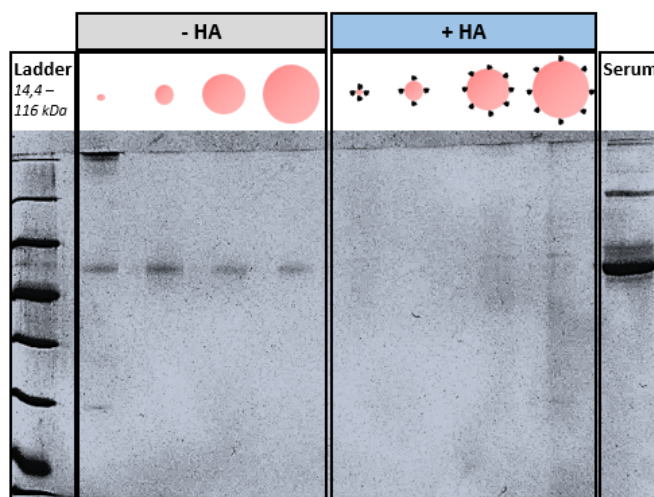

**Figure S2.** Determination of protein adsorption by using SDS-PAGE. Particles at a concentration of  $c(\text{Au})=18,000$  ppb were incubated in culture medium. After 1 h of incubation and several washing and centrifugation steps an SDS-PAGE was performed. On the left side of the figure a protein ladder was applied to the gel. On the right side a serum control was applied. A comparison of the spots of unmodified particles (-HA) and modified particles (+HA) reveals a significant protein adsorption of serum to the surface of the AuNPs.

### S3: Electron Microscopic Analysis of Nanoparticle Distribution and Aggregation Within the Trabecular Meshwork

Investigating the distribution pattern of 60 and 120 nm HA-AuNPs, only two 120 nm HA-AuNP were found to be in immediate contact.

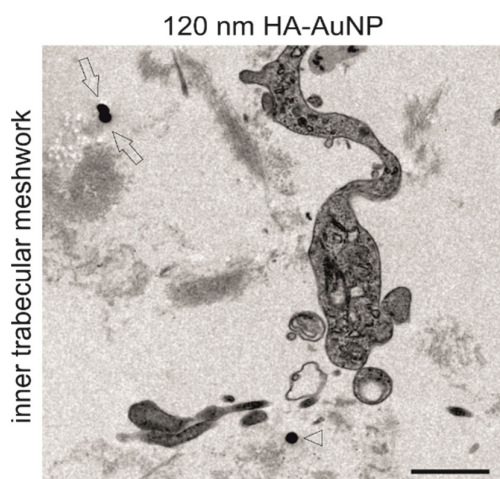

**Figure S3.** Nanoparticle aggregation within the trabecular meshwork after ex vivo perfusion with gold nanoparticles. The only two aggregated HA-AuNP found in this study (arrows indicate aggregated NPs, arrowhead indicates individual NP, scale bar represents 1  $\mu$ m).

### S4: MTT-Assay of AuNPs and HA-AuNPs

Cytotoxicity of all nanoparticle types was assessed using an MTT-assay (MTT=3-(4,5-dimethylthiazol-2-yl)-2,5-diphenyltetrazolium bromide). The assay was performed according to ISO 10993-5:2009 [2] (Biological evaluation of medical devices, part 5: Tests for in vitro cytotoxicity). HTM-N cells were seeded in 96-well plates at a density of 10,000 cells per well and allowed to adhere for 12 h. Every particle type was pre-incubated with cell culture medium containing 0.35% (*v/v*) FBS for 1 h. The pre-incubation was performed in the final medium containing a gold concentration of concentration 5500 ppb for every particle type. 100  $\mu$ L nanoparticles dispersed in cell culture medium was added to each well. SDS (0.1% (*v/v*)) served as a negative control and pure culture medium as a positive control (*n*=6). Cells were incubated with the test media for 24 h, afterwards the medium was removed and 200  $\mu$ L of serum-containing medium supplemented with 1.5 mM MTT was added to each well. After 4 h of incubation, the MTT solution was removed and 100  $\mu$ L of DPBS containing 10% SDS (*v/v*) was added to each well. After 14 h of incubation, absorbance at 570 and 690 nm was determined for each well using a FluoStar Omega fluorescence microplate reader (BMG Labtech, Ortenberg, Germany). The difference in absorbance at  $\lambda$ =570 and  $\lambda$ =690 nm was used to calculate the cell viability. For normalization, the viability of control cells was set at 100%.

In the in vitro experiments, the incubation time of the particles with the cells was set to 6 h. For the MTT-assay, the cells were incubated for a significantly longer time period of 24 h with the nanoparticles. Even after this prolonged incubation at the highest particle concentration used for cell experiments the cell viability was at least 80% or even higher. This strongly indicates that there is no cytotoxicity.

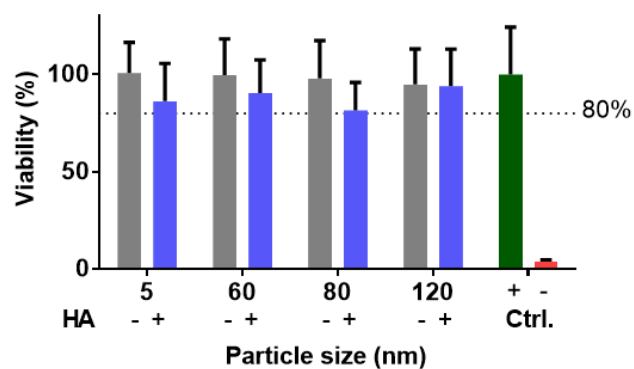

**Figure S4. MTT-Assay to determine the cell toxicity.** An MTT-assay was performed for all particle types using HTM-N cells. In all cases, the cell viability was at least 80% after 24 h. Positive and negative control (Ctrl.) show the expected results.

## References

1. C.D. Walkey, J.B. Olsen, H. Guo, A. Emili, W.C.W. Chan, Nanoparticle size and surface chemistry determine serum protein adsorption and macrophage uptake, *J. Amer. Chem. Soc.* **2012**, *134*, 2139–2147.
2. M. Gregoritz, V. Messmann, K. Abstiens, F.P. Brandl, A.M. Goeperich, Controlled Antibody Release from Degradable Thermoresponsive Hydrogels Cross-Linked by Diels-Alder Chemistry, *Biomacromolecules* **2017**, *18*, 2410–2418.
